# Supplementary material for: Development of a novel fluorescence ratiometric glucose sensor based on carbon dots and a potential fluorophore m-dihydroxybenzene
Source: Royal Society of Chemistry journal article supplement (doi:10.1039/c8ay01821a), 2018-01-01
Supplement: c8ay01821a1.pdf [file c8ay01821a1.pdf]

## Electronic Supporting Information

Development of a Novel Fluorescence Ratiometric Glucose Sensor based on Carbon Dots and Potencial  
Fluorophor m-Dihydroxybenzene

Hong Zhai\*, Yunfeng Bai, Haiqing Wang, Jun Qin, Huijun Liu, Feng Feng\*

College of Chemistry and Environmental Engineering, Shanxi Datong University, Datong 037009, China

\* Corresponding author.

E-mail: [zhaihong1981@163.com](mailto:zhaihong1981@163.com), Tel: +86-352-7158662, Fax : +86-352-610028.

[feng-feng64@263.net](mailto:feng-feng64@263.net), Tel: +86-352-7158662, Fax : +86-352-610028.

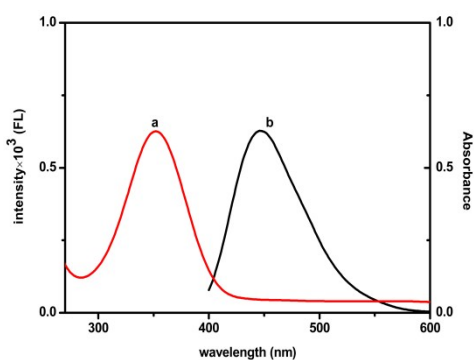

Fig. S1 The UV spectrum (a) and fluorescence spectrum (b) of carbon dots.

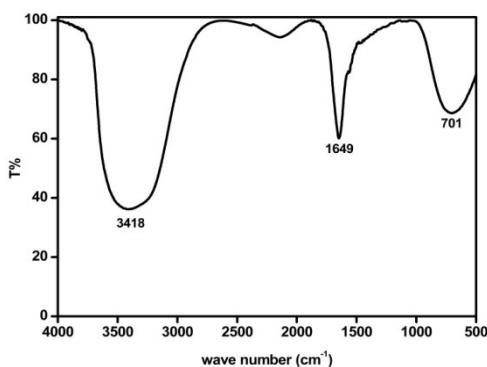

Fig. S2 Infrared spectrum of carbon dots.

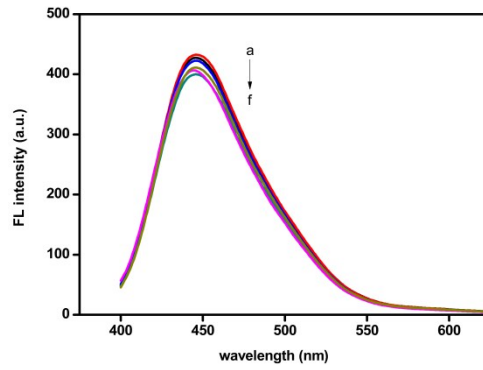

Fig. S3 The fluorescence spectra of 0.01 mg/ml CDs solution at different time (a→h: 0, 1, 2, 3, 6, 9 months).

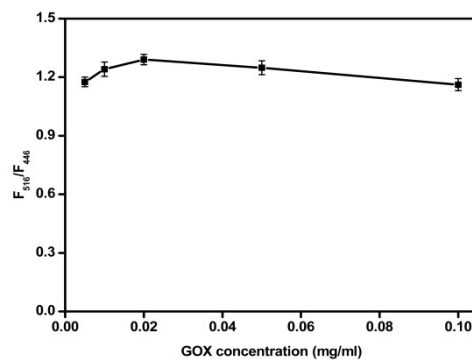

Fig. S4 The optimization of GOX concentration, and the final concentration of GOX are 0.005, 0.01, 0.02, 0.05, 0.1mg/ml, respectively, ( $C_{\text{CDs}} = 0.01 \text{ mol/L}$ ,  $C_{\text{glucose}} = 200 \mu\text{M}$ ,  $C_{\text{mDHB}} = 500 \mu\text{M}$ ).

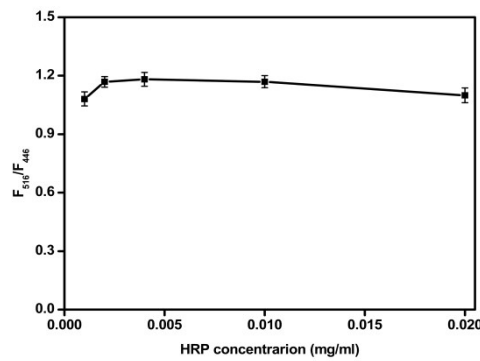

Fig. S5 The optimization of HRP concentration, and the final concentration of HRP are 0.001, 0.002, 0.004, 0.01, 0.02 mg/ml, respectively, ( $C_{\text{CDs}} = 0.01 \text{ mol/L}$ ,  $C_{\text{glucose}} = 200 \mu\text{M}$ ,  $C_{\text{mDHB}} = 500 \mu\text{M}$ ).

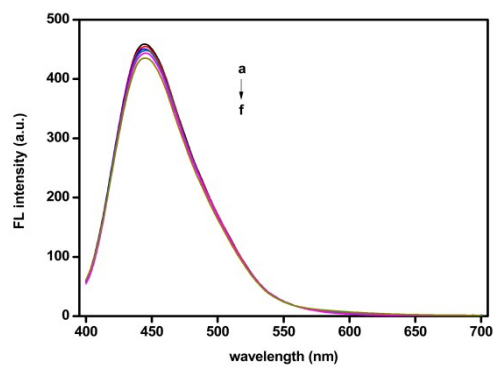

Fig. S6 Fluorescence spectra of CDs with different concentrations of mDHB, and the final concentrations of mDHB were 50 $\mu$ M, 100 $\mu$ M, 250 $\mu$ M, 500 $\mu$ M, 1000 $\mu$ M, respectively ( $C_{CDs} = 0.01$  mg/ml).
